# Supplementary material for: FAIR Genomes metadata schema promoting Next Generation Sequencing data reuse in Dutch healthcare and research
Source: PubMed Central journal article supplement (PMC9008059; doi:10.1038/s41597-022-01265-x), 2022-04-13
Supplement: 41597_2022_1265_MOESM1_ESM.pdf [file 41597_2022_1265_MOESM1_ESM.pdf]

# Supplementary Data S1:

## FAIR Genomes Consortium members

Gurnoor Singh<sup>1</sup>, XiaoFeng Liao<sup>1</sup>, Rajaram Kaliyaperumal<sup>6</sup>, Lisenka Vissers<sup>1</sup>, Jeroen van Reeuwijk<sup>1</sup>, Saskia Hiltemann<sup>7</sup>, Jasmin Böhmer<sup>3</sup>, Marissa de Valck<sup>2,3</sup>, Lennart F. Johansson<sup>2</sup>, Nienke van der Stoep<sup>6</sup>, Daoud Sie<sup>4</sup>, Marjan Weiss<sup>1</sup>, Geert Frederix<sup>3</sup>, Marco Roos<sup>6</sup>, Erik van Iperen<sup>8</sup>, Florian Gorter<sup>1</sup>, Terry Vrijenhoek<sup>3</sup>, Folkert W. Asselbergs<sup>3</sup>, Sander van den Hoek<sup>2</sup>, Joris van Montfrans<sup>3</sup>, Rolf Sijmons<sup>2</sup>, Hanneke W.M. van Deutekom<sup>3</sup>, Pieter Neerincx<sup>2</sup>, Fernanda de Andrade<sup>2</sup>, Anna Niehues<sup>1</sup>, Hindrik H.D. Kerstens<sup>10</sup>, Annika Jacobsen<sup>6</sup>, Katy Wolstencroft<sup>6,14</sup>, Ies Nijman<sup>3</sup>, Marcel Nelen<sup>1</sup>, Ariaan Siezen<sup>1</sup>, Koen ten Hove<sup>1</sup>, Nine Knoers<sup>2</sup>, Christian Gilissen<sup>1</sup>, Sander de Ridder<sup>4</sup>, Hans Scheffer<sup>1</sup>, Stefan Willems<sup>2</sup>, Wendy van Zelst-Stams<sup>1</sup>, Helger Ijntema<sup>1</sup>, Kim Elsink<sup>3</sup>, Bart de Koning<sup>9</sup>, Bauke Ylstra<sup>4</sup>, Erik Sistermans<sup>4</sup>, Patrick Kemmeren<sup>10</sup>, Ina Geurts-Giele<sup>7</sup>, Henne Holstege<sup>4</sup>, Christine Staiger<sup>11</sup>, Bastiaan Tops<sup>10</sup>, Susanne Rebers<sup>12</sup>, David van Zessen<sup>7</sup>, Valesca Retèl<sup>12</sup>, Edwin Cuppen<sup>13</sup>, Peter van Tintelen<sup>3</sup>, Esther van Enckevort<sup>2</sup>, Lieneke Steeghs<sup>1</sup>, Salome Scholtens<sup>2</sup>, Leon Mei<sup>6</sup>, Cor Oosterwijk<sup>5</sup>, Andrew Stubbs<sup>7</sup>, Jeroen Laros<sup>6</sup>, Jeroen A.M. Beliën<sup>4</sup>, Daphne Stemkens<sup>5</sup>, K. Joeri van der Velde<sup>2</sup>, Peter A.C. 't Hoen<sup>1</sup>, Mariëlle E. van Gijn<sup>2</sup> and Morris A. Swertz<sup>2</sup>.

<sup>1</sup> Radboud University Medical Center, Nijmegen, The Netherlands

<sup>2</sup> University Medical Center Groningen, The Netherlands

<sup>3</sup> University Medical Center Utrecht, The Netherlands

<sup>4</sup> Amsterdam UMC, Vrije Universiteit Amsterdam, Amsterdam, The Netherlands

<sup>5</sup> VSOP - Dutch Patient Alliance for Rare and Genetic Diseases

<sup>6</sup> Leiden University Medical Center, The Netherlands

<sup>7</sup> Erasmus Medical Center, Rotterdam, The Netherlands

<sup>8</sup> Durrer Center for Cardiovascular Research, Utrecht, The Netherlands

<sup>9</sup> Maastricht University Medical Center, The Netherlands

<sup>10</sup> Princess Máxima Center for Pediatric Oncology, Utrecht, The Netherlands

<sup>11</sup> Dutch Techcentre for Life Sciences, Utrecht, The Netherlands

<sup>12</sup> Netherlands Cancer Institute, Amsterdam, The Netherlands

<sup>13</sup> Hartwig Medical Foundation, Amsterdam, The Netherlands

<sup>14</sup> Leiden Institute for Advanced Computer Science, Leiden University, Leiden, The Netherlands
